# Supplementary material for: Fractionation of Raw and Parboiled Rice Husks with Deep Eutectic Solvents and Characterization of the Extracted Lignins towards a Circular Economy Perspective
Source: MDPI journal article supplement (doi:10.3390/molecules27248879), 2022-12-14
Supplement: s1 [file s1]

## Supplementary Materials

Figure S1.  $^1\text{H}$  NMR spectrum of DES 2 choline chloride/L-lactic acid (1:5 mol/mol). 2

Figure S2. Calibration curve of Folin-Ciocalteu phenol titration with vanillin. 3

Table S1: Yields of mass recovery in the different tested DESs. 4

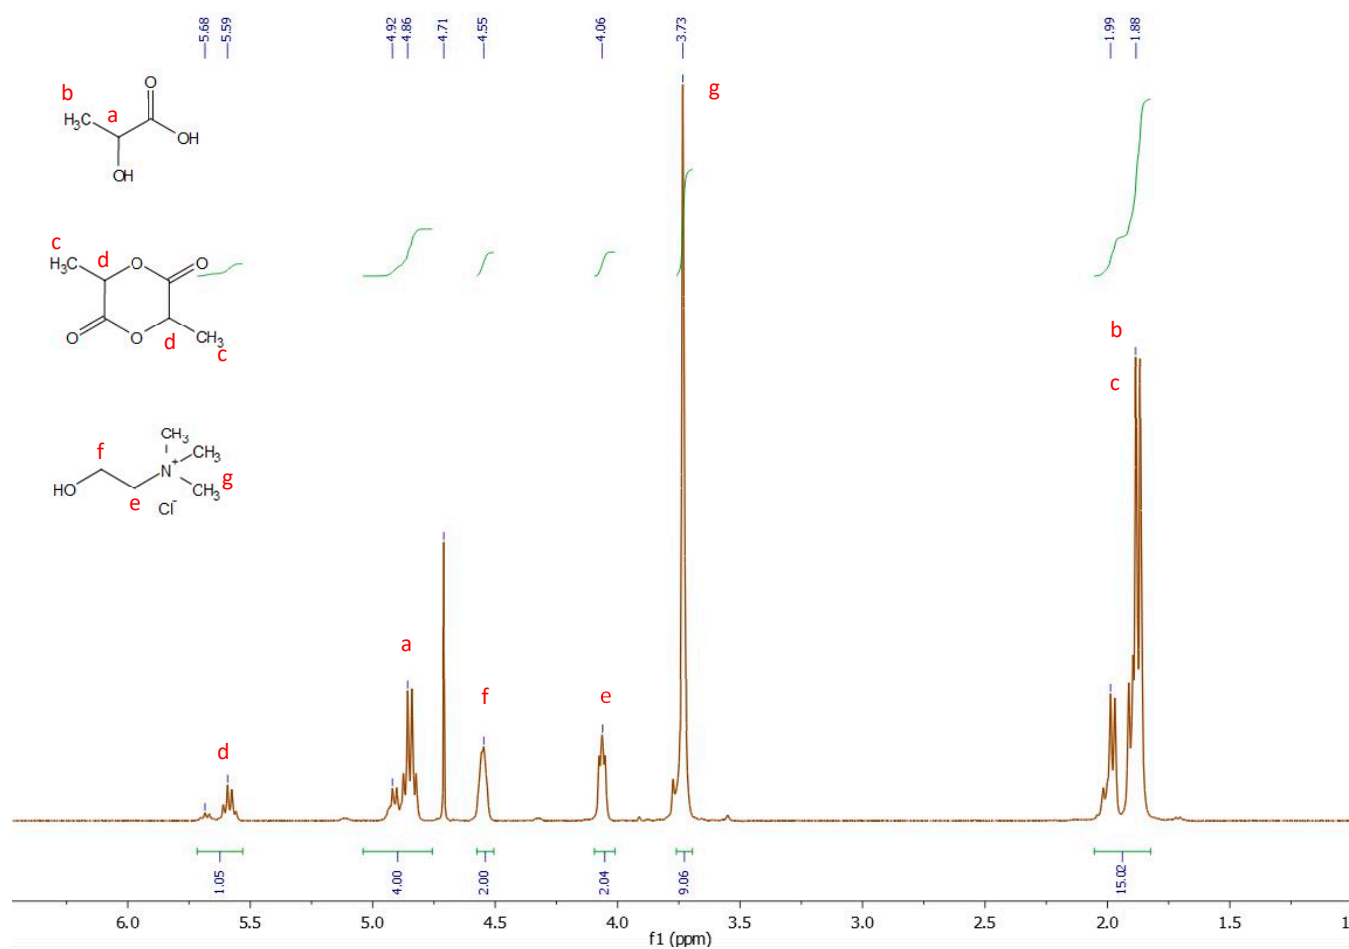

**Figure S1.**  $^1\text{H}$  NMR spectrum of DES 2 choline chloride/L-lactic acid (1:5 mol/mol).

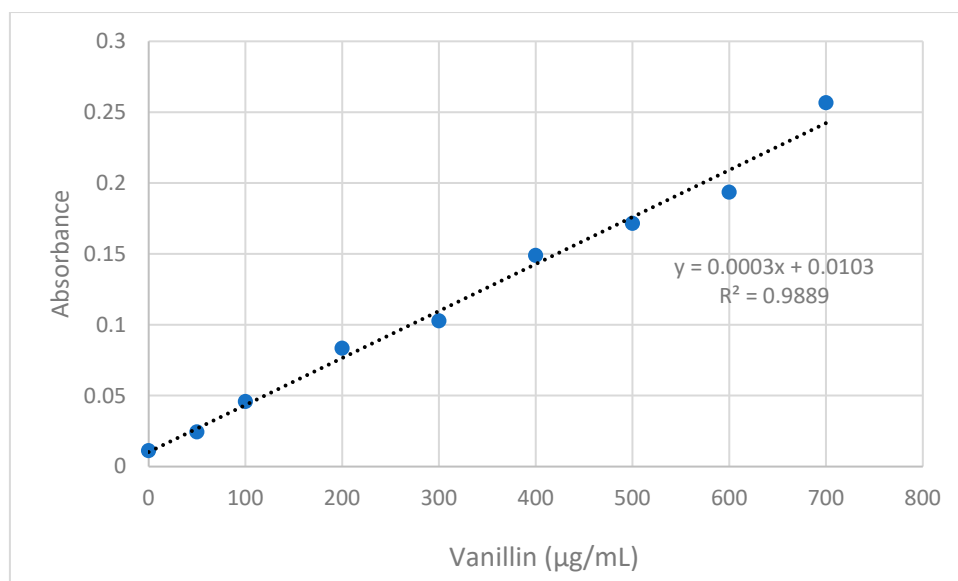

**Figure S2.** Calibration curve of Folin-Ciocalteu phenol titration with vanillin.

| DES | Cellulose-enriched<br>fraction from wRH<br>(% w/w Biomass) | Lignin fraction<br>from wRH<br>(% w/w Biomass) | Cellulose-enriched<br>fraction from pRH<br>(% w/w Biomass) | Lignin fraction<br>from pRH<br>(% w/w Biomass) |
|-----|------------------------------------------------------------|------------------------------------------------|------------------------------------------------------------|------------------------------------------------|
| 1   | -                                                          | -                                              | 65.2<br>(with silica)                                      | 8.02                                           |
| 2   | 46.6                                                       | 15.9                                           | 47.2<br>(without silica)                                   | 14.5                                           |
| 3   | -                                                          | -                                              | -                                                          | -                                              |
| 4   | -                                                          | -                                              | 70.1 (with silica)                                         | 3.64                                           |

**Table S1.** Yields of mass recovery in the different tested DESs.

(NB: “-” indicates no results in terms of biomass fractionation).
